# Supplementary material for: Cross-family small GTPase ubiquitination by the intracellular pathogen Legionella pneumophila
Source: PubMed Central journal article supplement — bioRxiv. 2023 Aug 3:2023.08.03.551750. Preprint. [Version 1] doi: 10.1101/2023.08.03.551750 (PMC10418220; doi:10.1101/2023.08.03.551750), 2023-08-03
Supplement: NIHPP2023.08.03.551750v1-supplement-4.pdf [file NIHPP2023.08.03.551750v1-supplement-4.pdf]

## Supplemental Information

**Figure 1-S1: Quantification and quality control plots of ubiquitinomics data. Related to Figure 1.** Quality control plots for diGly enriched dataset were generated using the artMS Bioconductor package (version 0.9) (Jimenez-Morales *et al.*, 2019). **(A)** Percent of contaminants (CON), proteins (PROT) and reversed sequences (REV) in each experimental condition (control, dotA-1h, dotA-8h, WT-1h, WT-8h) were quantified to adjust the false-discovery-rate (FDR). **(B)** Samples were normalized across fractions by median-centering the Log2-transformed MS1 intensity distributions. **(C)** Correlation table and matrix showing the clustering of the different experimental conditions. **(D)** Principal Component analysis of normalized MS Intensities of experimental conditions (control,  $\Delta dotA$ -1h,  $\Delta dotA$ -8h, WT-1h, WT-8h). PC1 and PC2 captured most of the variability. Loading variables are represented as vectors. The smaller angle between control and the mutant time points ( $\Delta dotA$ -1h,  $\Delta dotA$ -8h) implies a larger positive correlation between them, as opposed to a lower correlation (larger angle) between the Control and the WT strain.

**Figure 1-S2: Analysis of T4SS-independent (*L.p.*  $\Delta dotA$ ) changes in the host cell ubiquitinome. Related to Figure 1.** **(A)** Counts of proteins with a significant increase (green) or decrease (magenta) in ubiquitination compared to uninfected control for  $\Delta dotA$  1hr and  $\Delta dotA$  8hr

(same data shown in Figure 1B, repeated here for clarity). **(B)** Overlap of proteins with a significant increase (green) or decrease (magenta) in ubiquitination compared to uninfected control in the 1-hour vs 8-hour *L.p.*  $\Delta dotA$  infected conditions. **(C)** Volcano plot representation of all ubiquitinome data in  $\Delta dotA$  vs uninfected comparison at 1- and 8-hours post-infection. Imputed values are shown as diamonds. Significance threshold is indicated by the dotted line. **(D)** Subcellular localization analysis of proteins with a significant increase or decrease in ubiquitination compared to uninfected control during *L.p.*  $\Delta dotA$  infection for 1 or 8 hours. **(E)** Metascape pathway and protein complex analysis of proteins with a significant increase or decrease in ubiquitination compared to uninfected control during *L.p.*  $\Delta dotA$  infection for 1 or 8 hours. Terms not significantly enriched for a given experimental condition are represented by white boxes. **(F)** Overlap of proteins with a significant increase (green) or decrease (magenta) in ubiquitination compared to uninfected control in the WT *L.p.* vs.  $\Delta dotA$  infected conditions, at both 1- and 8-hours post-infection.

**Figure 1-S3: Quantification and quality control plots of abundance data. Related to Figure 1.** Identical analysis as in Figure 1S1 using abundance data.

**Figure 1-S4: Analysis of *L.p.*-induced changes in host cell abundance. Related to Figure 1.** Analysis of proteins with significant increases (green) or decreases (magenta) in abundance compared to uninfected control for WT and  $\Delta dotA$  infected conditions, at both 1 and 8 hours post infection. **(A)-(D)** Comparable to analyses in Fig 1 and Fig 1S2. **(E)** Log2FC comparison of proteins with significant abundance change (grey points), significant ubiquitination change (light blue points), or both significant abundance and ubiquitination change (dark blue points) during infection with WT *L.p.* relative to uninfected control. Proteins with insignificant abundance and ubiquitination changes are shown in white. Data shown are at 1-hour post-infection (left) and 8-hours post-infection (right).

**Figure 2-S1: Quantification of diGlycine site data. Related to Figure 2.** Counts of diGly sites with a significant increase (green) or decrease (magenta) compared to uninfected control for the indicated infection conditions. Significance threshold:  $|\log_2(FC)| > 1$ ,  $p < 0.05$ . DiGlycine sites falling on small GTPases indicated in red.

**Figure 2-S2: List of significantly regulated diGly sites falling on small GTPases. Related to Figure 2.** All significantly changing diGlycine sites falling on small GTPases during WT and  $\Delta dotA$  *L.p.* infection, organized by subfamily and infection timepoint. Cell color and number indicate Log2FC. White cells indicate no significant change. Due to the significant homology between various small GTPases, some trypsinized peptides could not be distinguished between multiple proteins. DiGlycine sites that could be assigned to multiple proteins are indicated with a "/". In our downstream analyses, we use a conservative approach and only consider the first small GTPase listed (e.g. NRAS\_K147 / KRAS\_K147, only NRAS\_K147 is counted as a small GTPase ubiquitination site).

**Figure 2-S3: Extended immunoblot analysis of small GTPase ubiquitination confirmations. Related to Figure 2.** Extension of Figure 2B-E. Immunoblot analysis of lysates prepared from HEK293T FcyR cells transiently transfected with the indicated GFP-tagged small GTPase, then infected with either WT or  $\Delta dotA$  *L.p.* for 1 to 4 hours, or left uninfected. Blots were probed with anti-GFP and anti-Hsp70 antibodies. Monoubiquitinated GTPase indicated with an arrow.

**Figure 3-S1: Sequence alignment of ubiquitinated small GTPases with UB sites indicated. Related to Figure 3.** Sequence alignment of small GTPases ubiquitinated during infection. 61 of 63 ubiquitinated small GTPases represented, with RRAGC and ARL13B omitted for visual clarity

due to their significant length. Sequence colored by conservation within the small GTPase superfamily, from white (non-conserved) to black (extremely highly conserved residue). Ubiquitinated residues at either 1- or 8-hours post infection are colored in bright pink and outlined in black, and deubiquitinated residues are colored in dark blue. Structural and functional regions indicated above, using Rab1A as an example. Regions frequently ubiquitinated across detected small GTPases are underlined in pink and numbered 1-10. ARL13B\_K39 and RRAGC\_K79 fall in UB region #2. ARL13B\_K203 falls in UB region #10.

**Figure 4-S1: Rab10 ubiquitination is not controlled by DrrA and requires membrane association.** (A) Immunoblot analysis of lysates prepared from HEK293T FcγR transfected with 3XFlag Rab10 and infected with a  $\Delta drrA$  *L.p.* strain panel (WT,  $\Delta dotA$ ,  $\Delta drrA$ , and  $\Delta drrA$  complemented with empty vector or plasmid encoded DrrA WT or D110, 112A) for 1 hour (MOI=50). Monoubiquitinated Rab10 indicated with an arrow. (B) Quantification of biological replicates (N=3) of experiment shown in (A). Normalized Rab10 monoubiquitination intensity was calculated as a percentage of WT *L.p.* infection levels (see Methods). (C) Immunoblot analysis of monoubiquitination of Rab10 WT vs  $\Delta CAAX$  during *L.p.* infection. HEK293T FcγR cells were transfected with either 3X Flag Rab10 WT or  $\Delta CAAX$ , then infected with WT or  $\Delta dotA$  *L.p.* for 1 hour (MOI=50) or left uninfected. Lysates were probed with anti-Flag antibody. Monoubiquitinated Rab10 indicated with an arrow.

**Figure 5-S1: Rab5 ubiquitination reproduces across cell lines and isoforms and is dependent upon membrane localization. Related to Figure 5.** (A) Immunoblot analysis of lysates prepared from HEK293T FcγR transfected with 3XFlag Rab5A and infected with *L.p.* WT or  $\Delta dotA$ . (B) Immunoblot analysis of lysates prepared from HeLa FcγR transfected with 3XFlag Rab5A and infected with *L.p.* WT or  $\Delta dotA$ . (C) Immunoblot analysis of lysates prepared from HEK293T FcγR transfected with 3XFlag Rab5B or 3XFlag Rab5C and infected with *L.p.* WT or  $\Delta dotA$ . (D) and (E) Immunofluorescence analysis of mCherry Rab5A WT or  $\Delta CAAX$  LCV recruitment. HeLa FcγR cells were transfected with indicated construct, then infected for 1 hour with either WT or  $\Delta dotA$  *L.p.*, fixed, and stained with anti-*Legionella* antibody. (D) Representative images, and (E) quantification of mCherry positive LCVs as in (D). (F) Immunoblot analysis of ubiquitination of Rab5A WT vs  $\Delta CAAX$  during *L.p.* infection. HEK293T FcγR cells were transfected with either 3X Flag Rab5A WT or  $\Delta CAAX$ , then infected with WT or  $\Delta dotA$  *L.p.* for 4 hours or left uninfected. Lysates were probed with anti-Flag antibody. (G) Quantification of normalized Rab5A  $\Delta CAAX$  mUb intensity as a percent of Rab5A WT mUb during WT *L.p.* infection (see Methods). Biological replicates (N=4) were carried out as in (G). For all bar graphs: bars represent mean value, error bars represent standard deviation. Individual points are values from each biological replicate. Statistical analysis of LCV scoring quantification: G test of independence was performed on pooled counts (positive vs. negative) from all biological replicates. Upon verifying significance ( $p < 0.05$ ), pairwise comparisons between strains were evaluated by post-hoc G-test using the Bonferroni-adjusted p-value as a significance threshold ( $p = 0.008$ ). \* =  $p < 0.008$ , \*\* =  $p < 0.0008$ , \*\*\* =  $p < 0.00008$ , n.s. =  $p > 0.008$ .

**Figure 7-S1: Rab1 ubiquitination is primarily promoted by SdcA. Related to Figure 7.** (A) Immunoblot analysis of lysates prepared from HEK293T FcγR transfected with 3XFlag Rab1A and infected with a  $\Delta sidC/sdcA$  *L.p.* strain panel (WT,  $\Delta dotA$ ,  $\Delta sidC/sdcA$ , and  $\Delta sidC/sdcA$  complemented with empty vector or plasmid encoded SdcA or SidC) for 1 hour (MOI=50). (B) Quantification of biological replicates (N=3) of experiment shown in (A). Normalized Rab1A monoubiquitination intensity was calculated as a percentage of WT *L.p.* infection levels (see Methods).

**Figure 7-S2: Small GTPases with detected ubiquitinations overlap with mammalian small GTPases known to be recruited to the LCV. Related to Figure 7.** Compiled list of (1) small GTPases with detected ubiquitination in our ubiquitinomics data and (2) mammalian small GTPases known to be recruited to the LCV as assessed by immunofluorescent and/or purified LCV mass spectrometry approaches. Data type indicators: (+) detected via mass spectrometry of purified LCV, (•) detected via immunofluorescence, (∅) not detected via immunofluorescence. Sources: **(1)** (Clemens *et al.*, 2000a) **(2)** (Kagan and Roy, 2002) **(3)** (Nagai *et al.*, 2002) **(4)** (Derré and Isberg, 2004) **(5)** (Kagan *et al.*, 2004) **(6)** (Hoffmann *et al.*, 2014) **(7)** (Bruckert and Kwaik, 2015) **(8)** (Schmölders *et al.*, 2017) **(9)** (Jeng *et al.*, 2019) **(10)** (Liu *et al.*, 2020) **(11)** (Kawabata *et al.*, 2021).

**Figure 7-S3: Small GTPases with detected ubiquitinations overlap with *Dictyostelium* small GTPases known to be recruited to the LCV. Related to Figure 7.** Compiled list of *Dictyostelium* (amoebal) small GTPases known to be recruited to the LCV as assessed by immunofluorescent and/or purified LCV mass spectrometry approaches. Data type indicators: (+) detected via mass spectrometry of purified LCV, (•) detected via immunofluorescence, (∅) not detected via immunofluorescence. Closest human homologues were determined via Dictybase (<http://dictybase.org/>) and/or protein BLAST. Sources: **(1)** (Urwylér *et al.*, 2009) **(2)** (Rothmeier *et al.*, 2013) **(3)** (Hoffmann *et al.*, 2014) **(4)** (Schmölders *et al.*, 2017) **(5)** (Vormittag *et al.*, 2023).

**Supplemental Table 1 – HPLC and MS methods.xlsx**

**Supplemental Table 2 – Infection Proteomics Dataset.xlsx**

**Supplemental Table 3 – Pathway and Protein Complex Enrichment Analysis.xlsx**

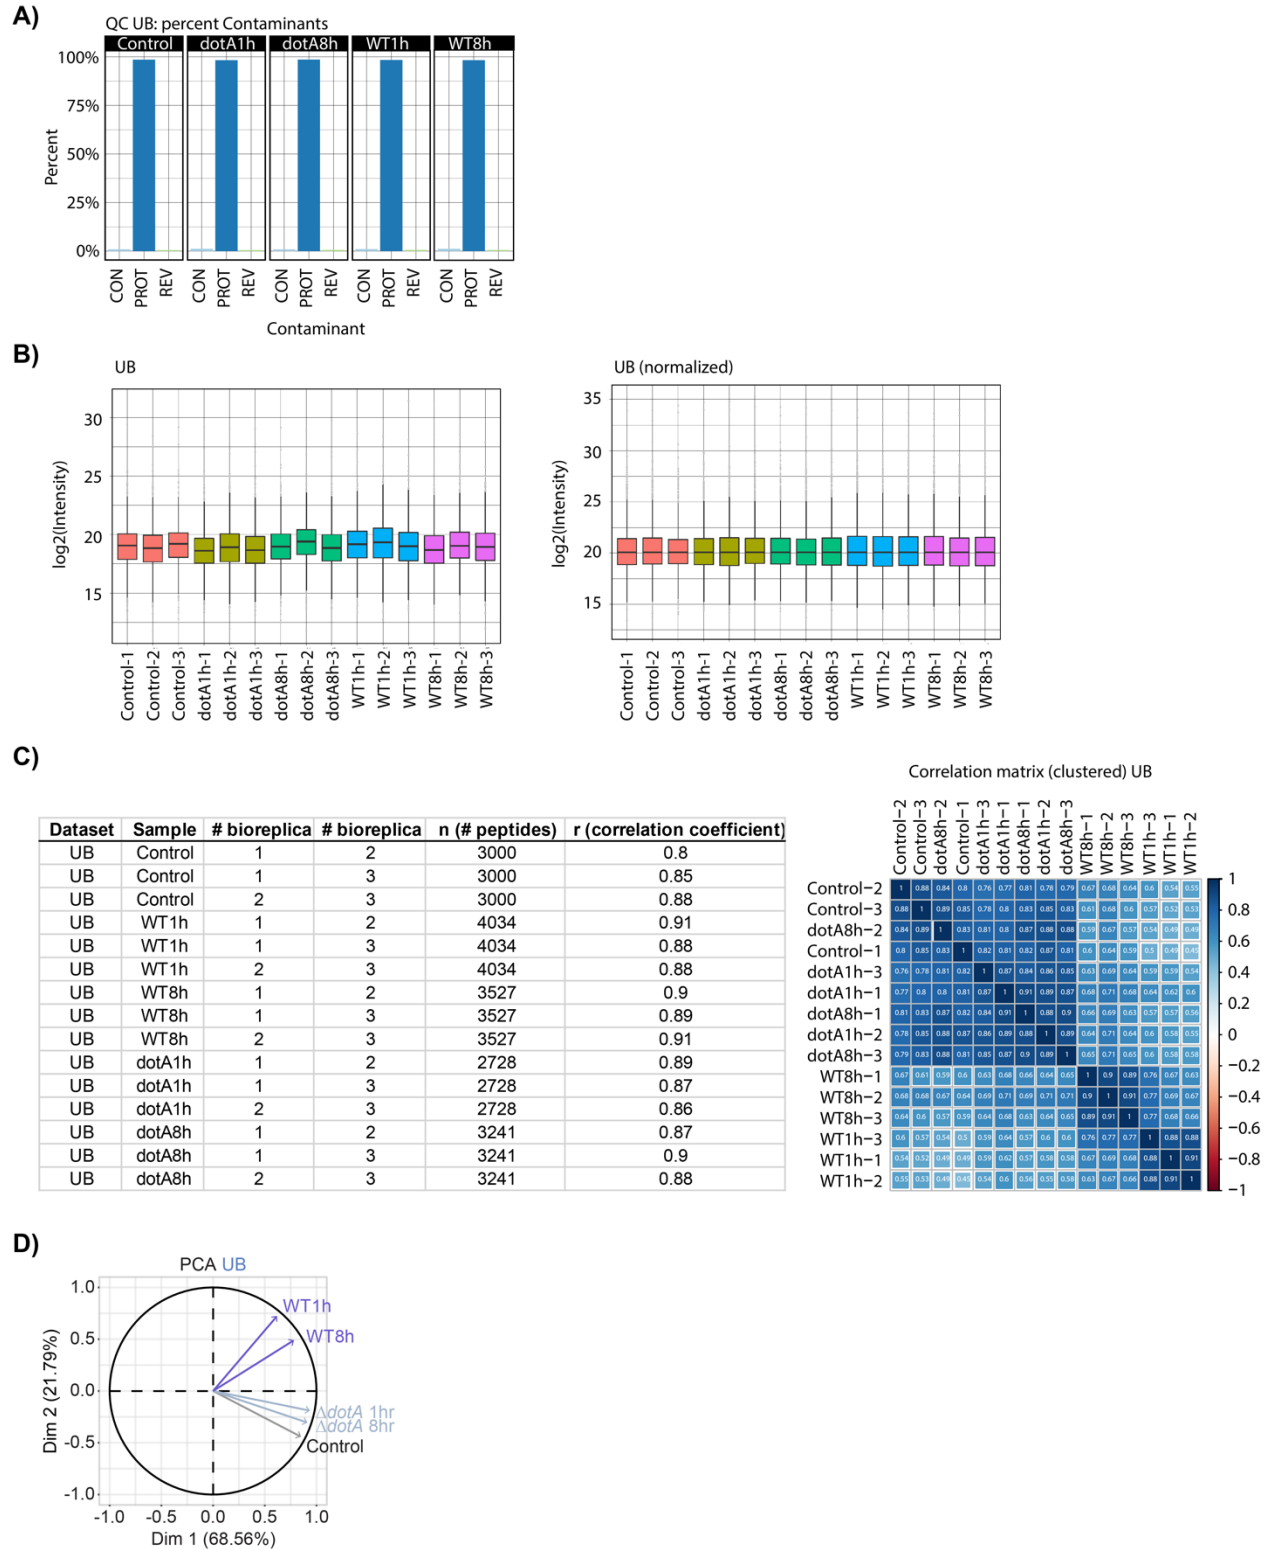

**Figure 1S1: Quantification and quality control plots of ubiquitinomics data. Related to Figure 1.**

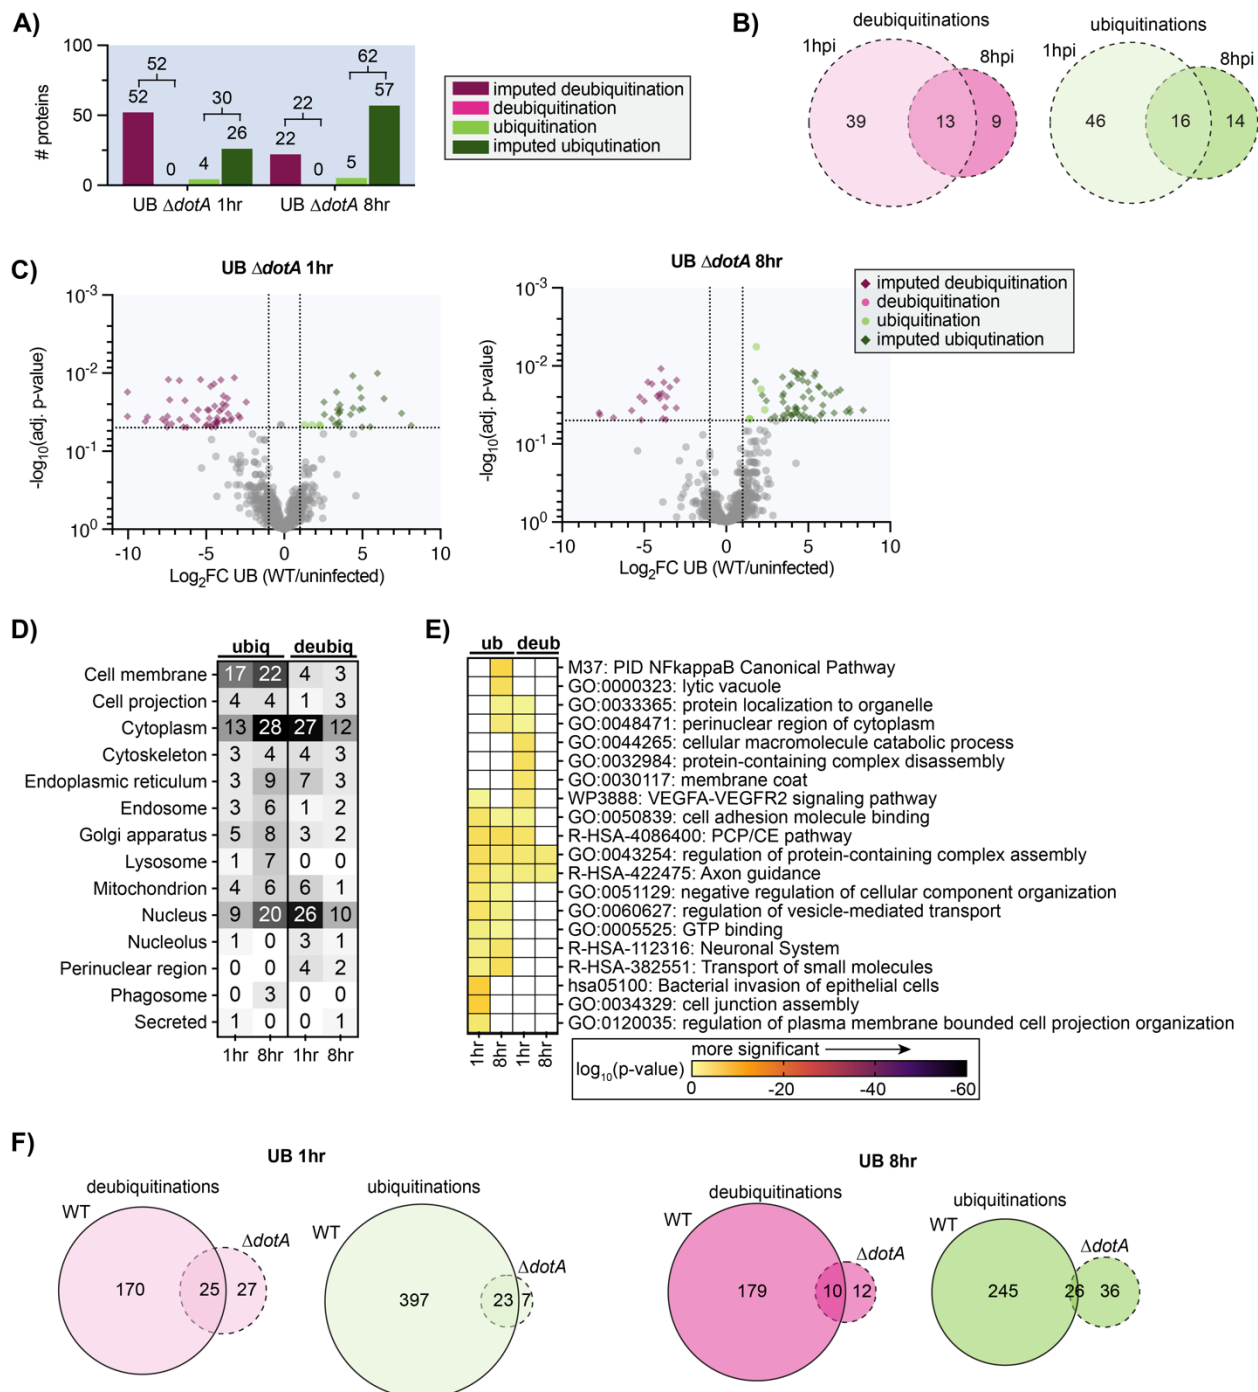

**Figure 1S2: Analysis of T4SS-independent (*L.p. ΔdotA*) changes in the host cell ubiquitinome. Related to Figure 1**

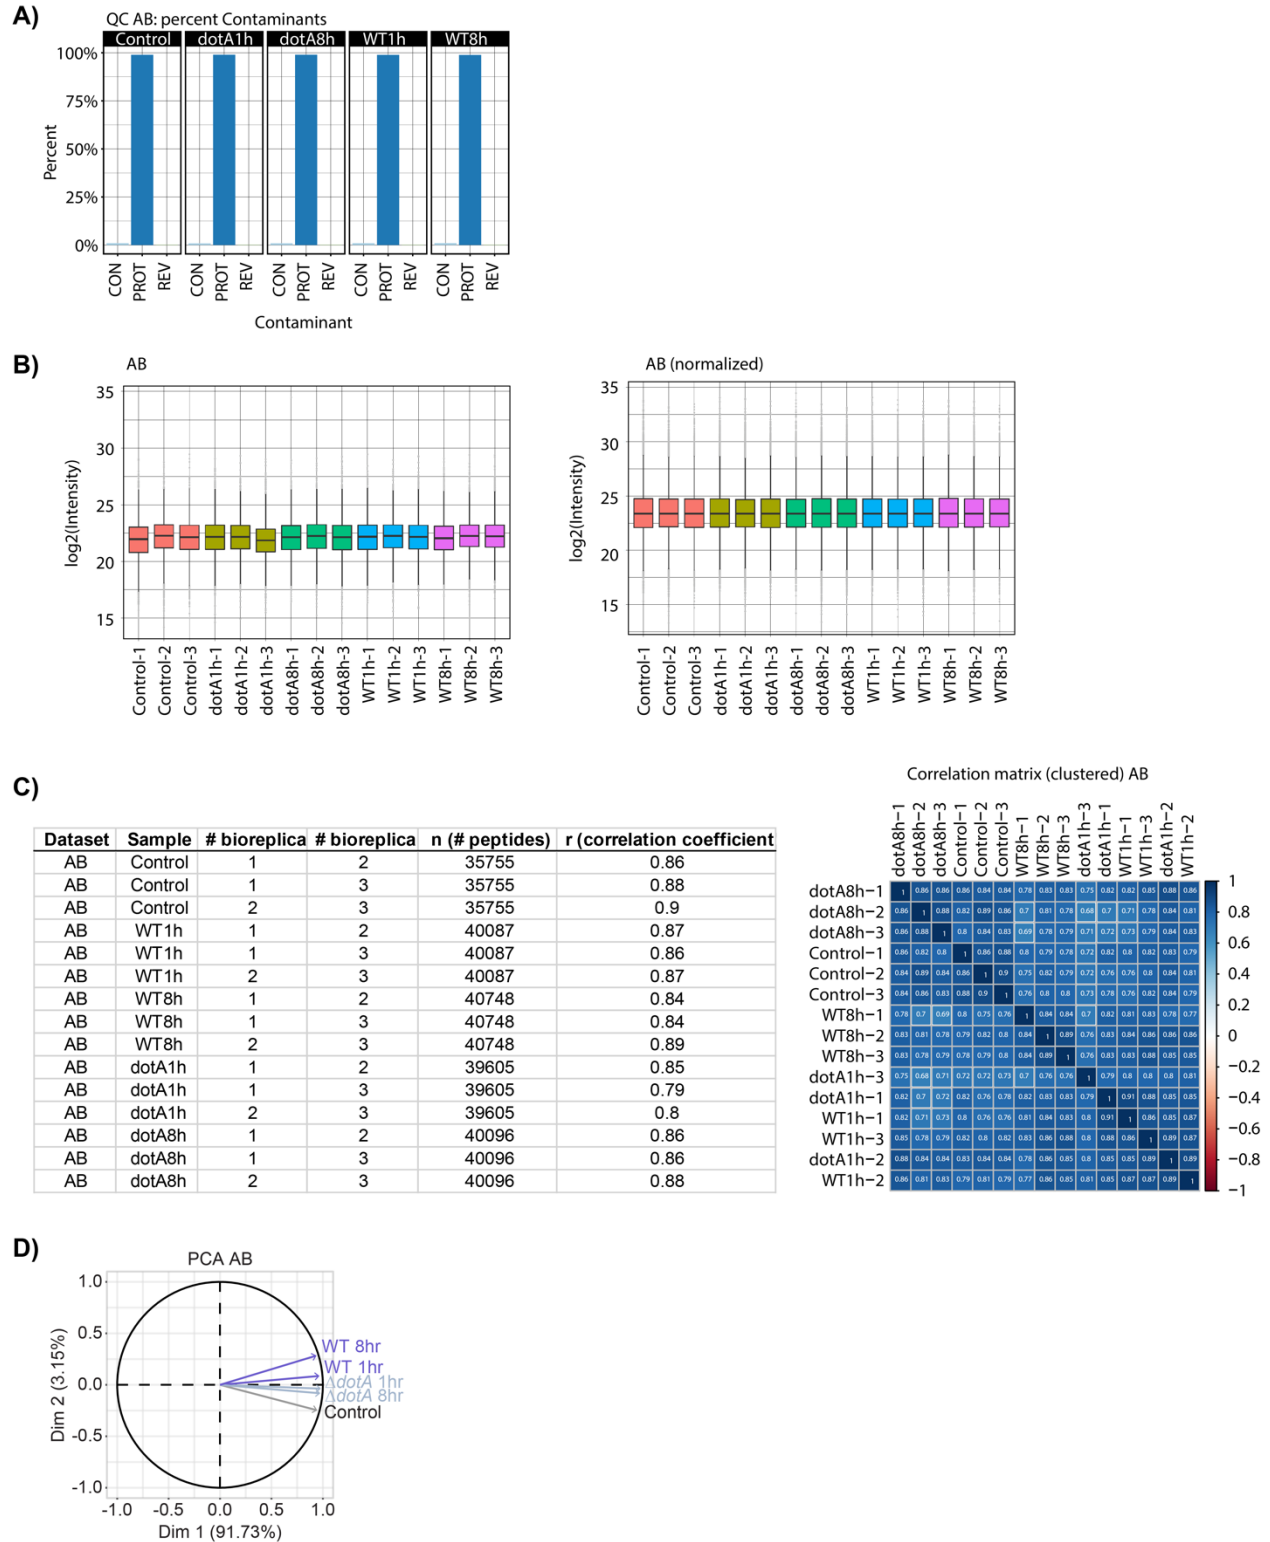

**Figure 1S3: Quantification and quality control plots of abundance data. Related to Figure**

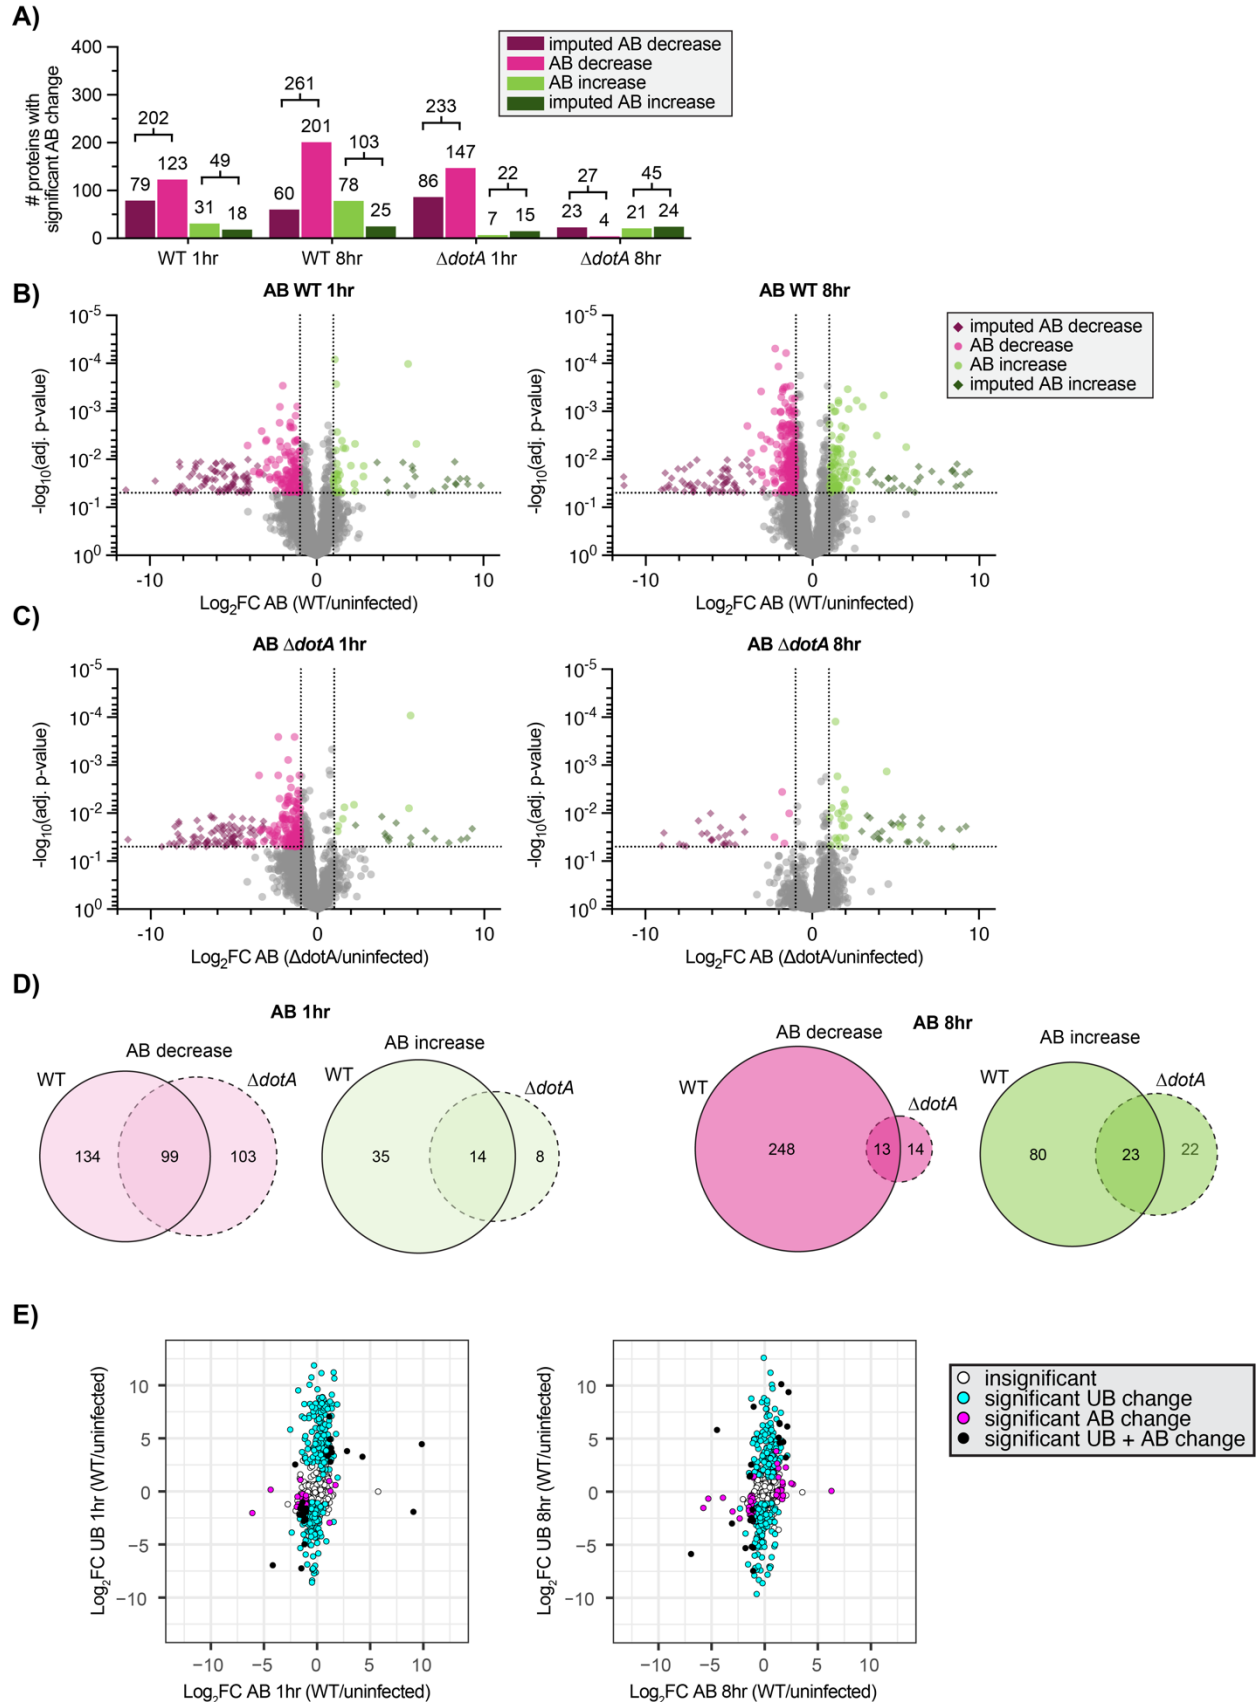

**Figure 1S4: Analysis of *L.p.*-induced changes in host cell abundance. Related to Figure 1.**



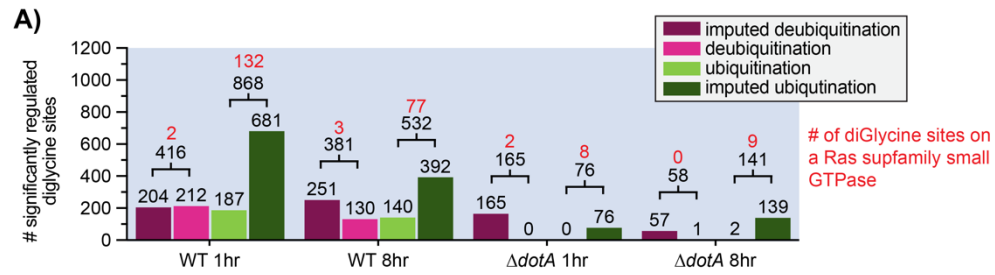

**Figure 2S1: Quantification of diglycine site data. Related to Figure 2.**

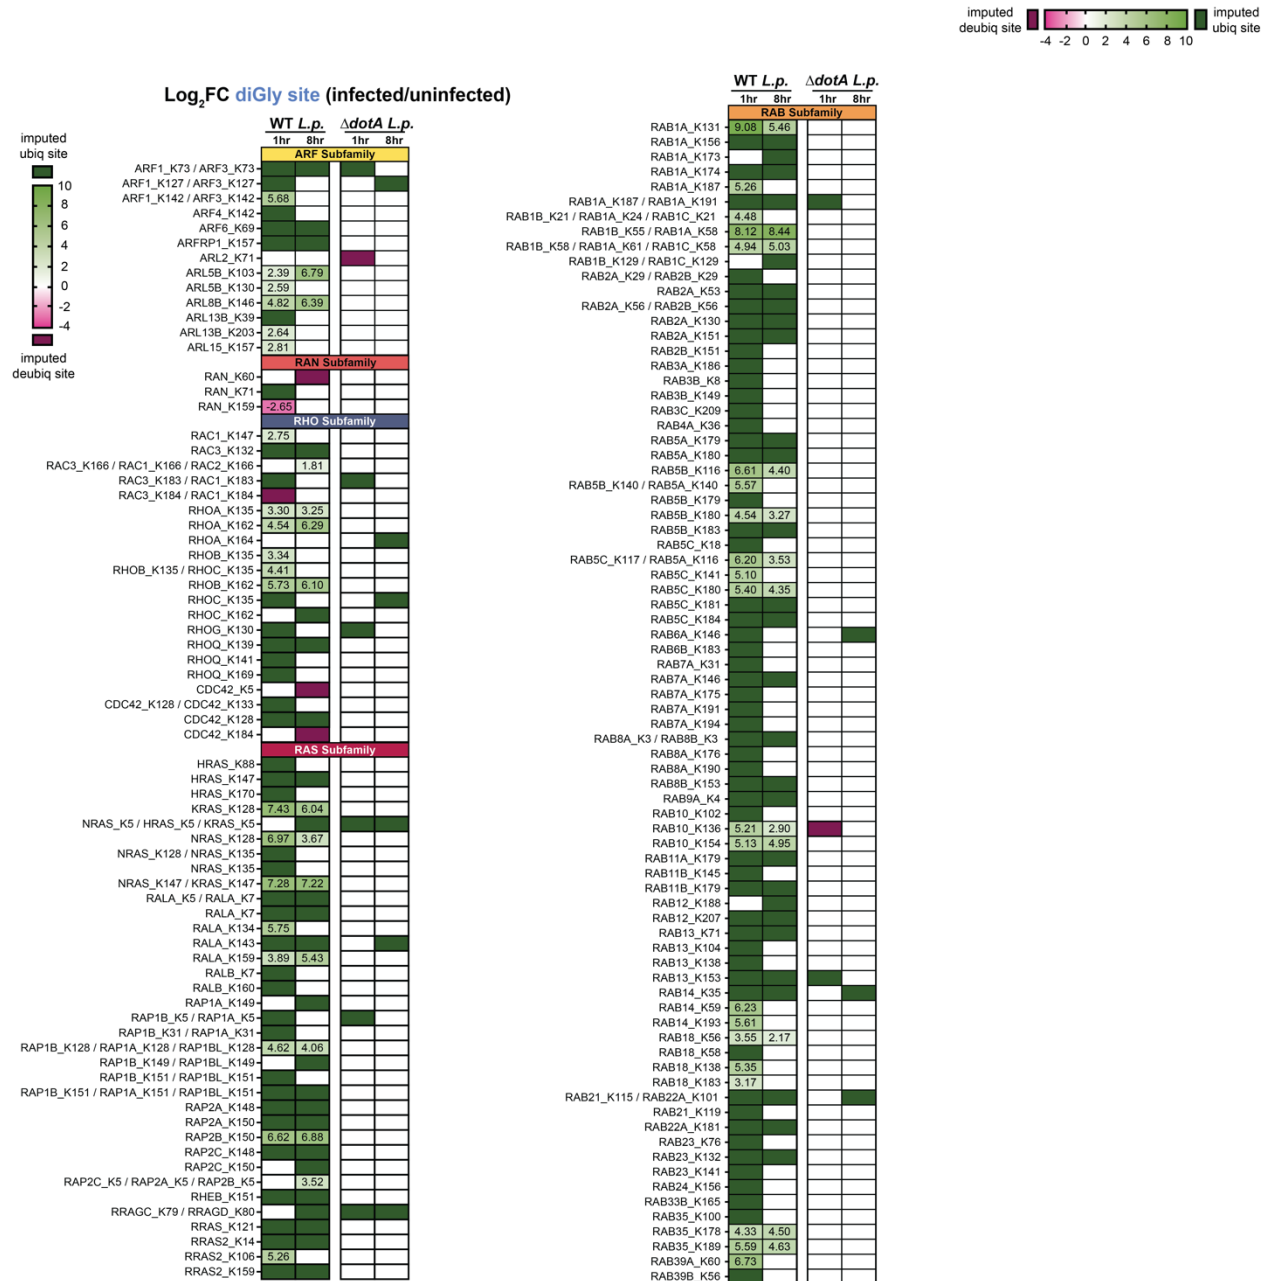

**Figure 2S2: List of significantly regulated diGly sites falling on small GTPases. Related to Figure 2.**

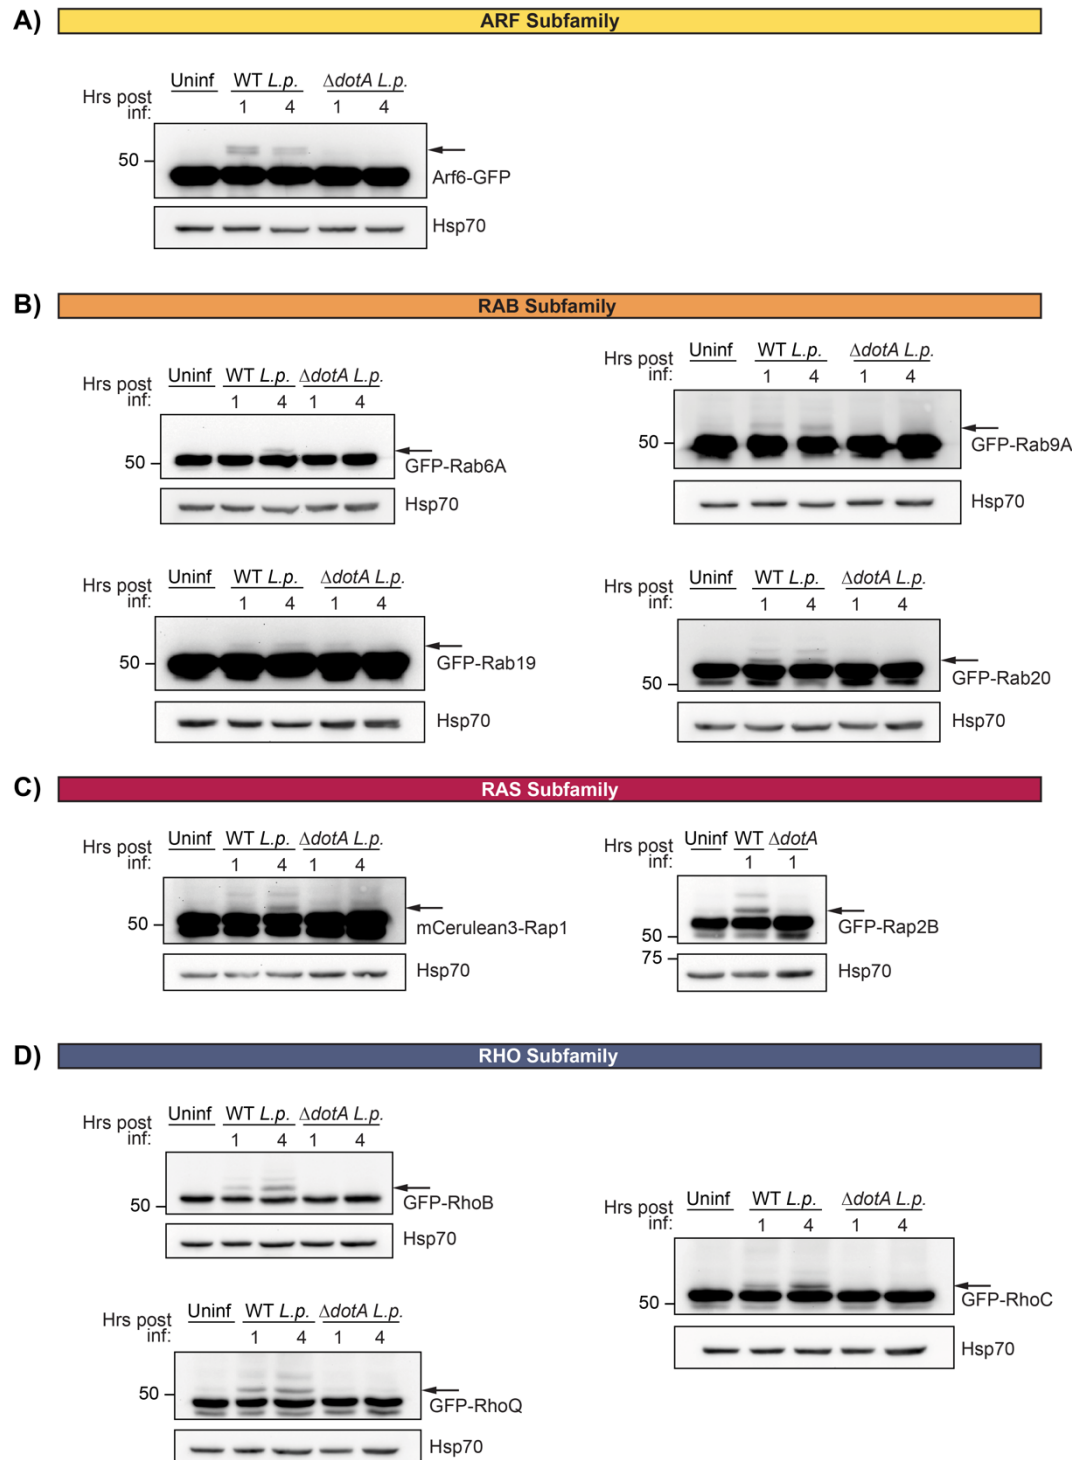

**Figure 2S3: Extended immunoblot analysis of small GTPase ubiquitination confirmations. Related to Figure 2.**

**Rab1a secondary structure -**

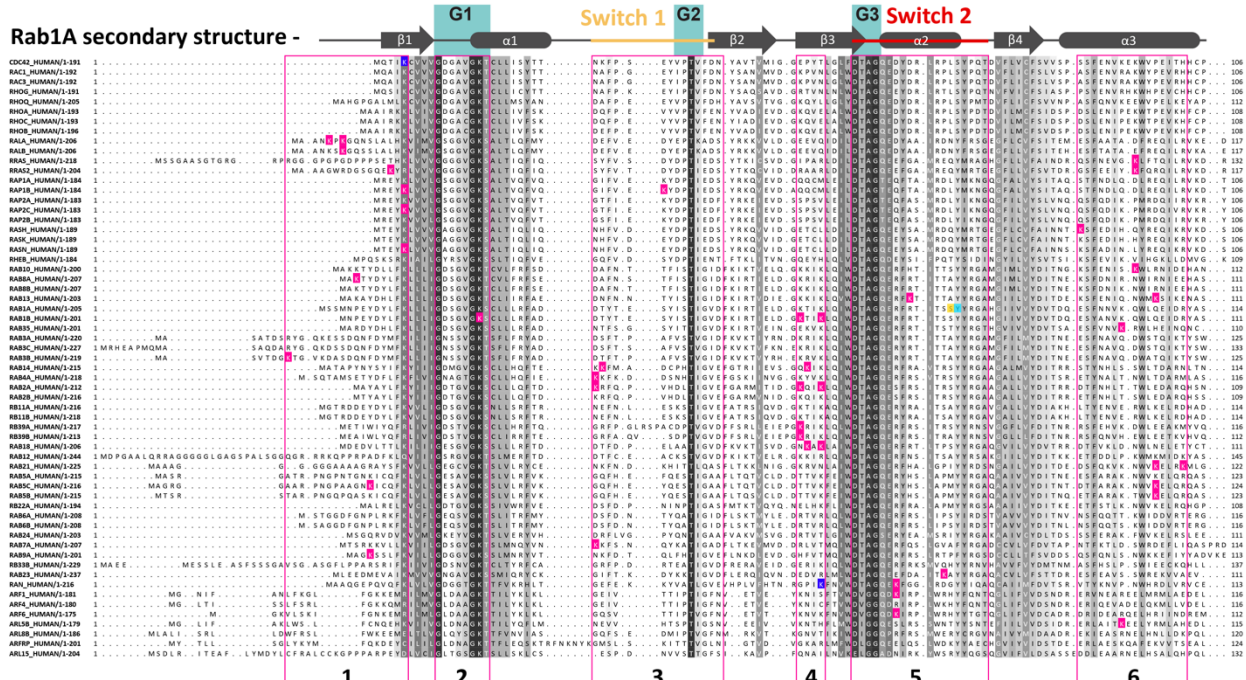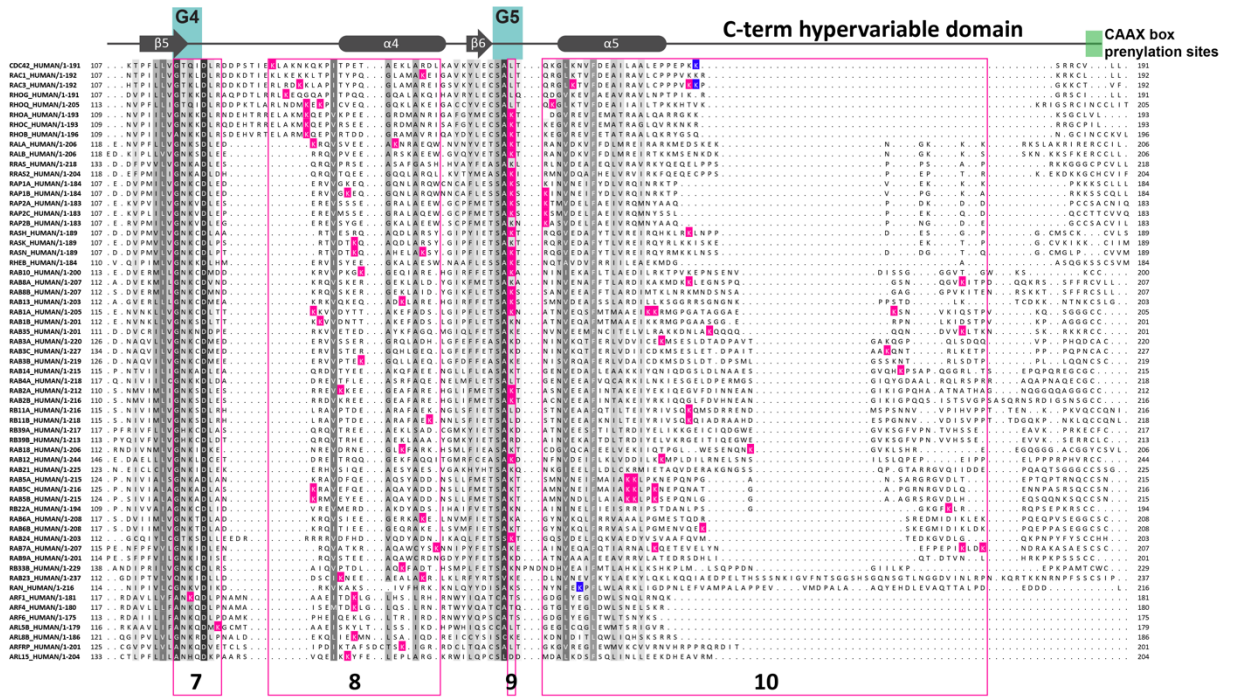

**Legend**  
**K** – ubiquitination site  
**A** – deubiquitination site  
**1** – Ubiq site region

**Figure 3S1: Sequence alignment of ubiquitinated small GTPases with UB sites indicated. Related to Figure 3.**

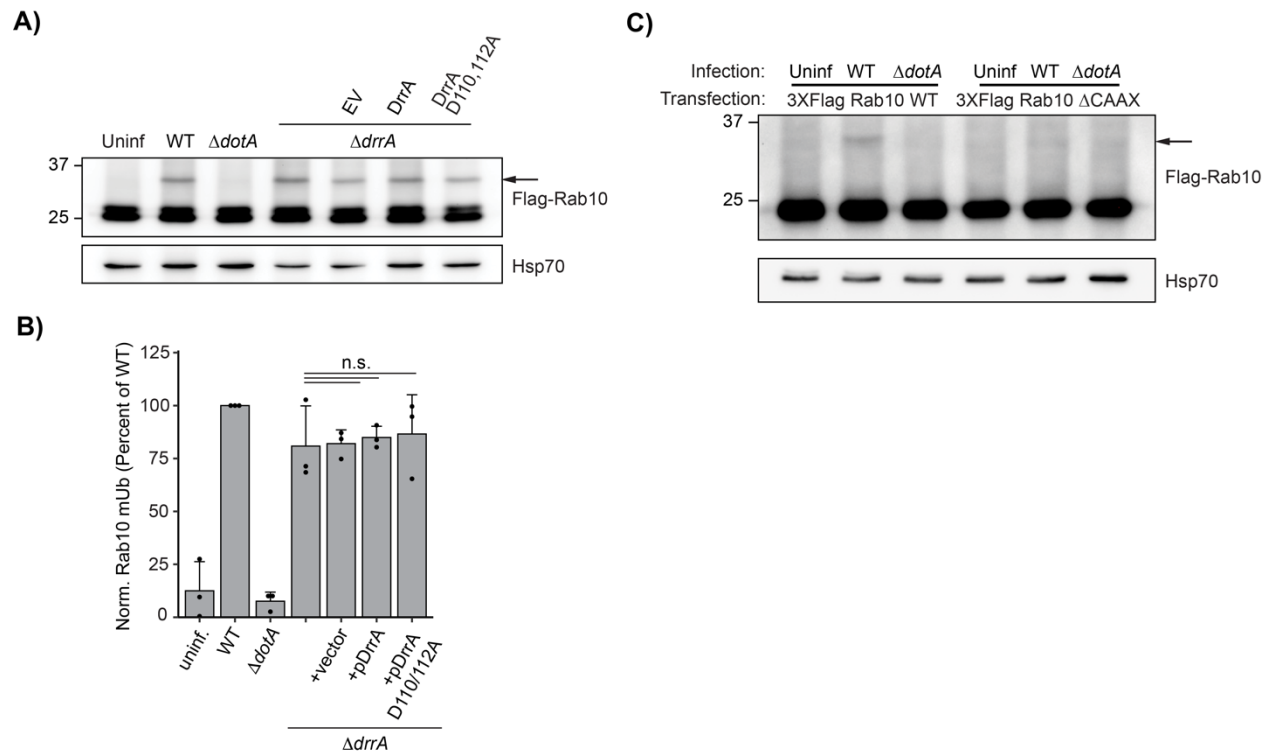

**Figure 4S1: Rab10 ubiquitination is not controlled by DrrA and requires membrane association. Related to Figure 4.**

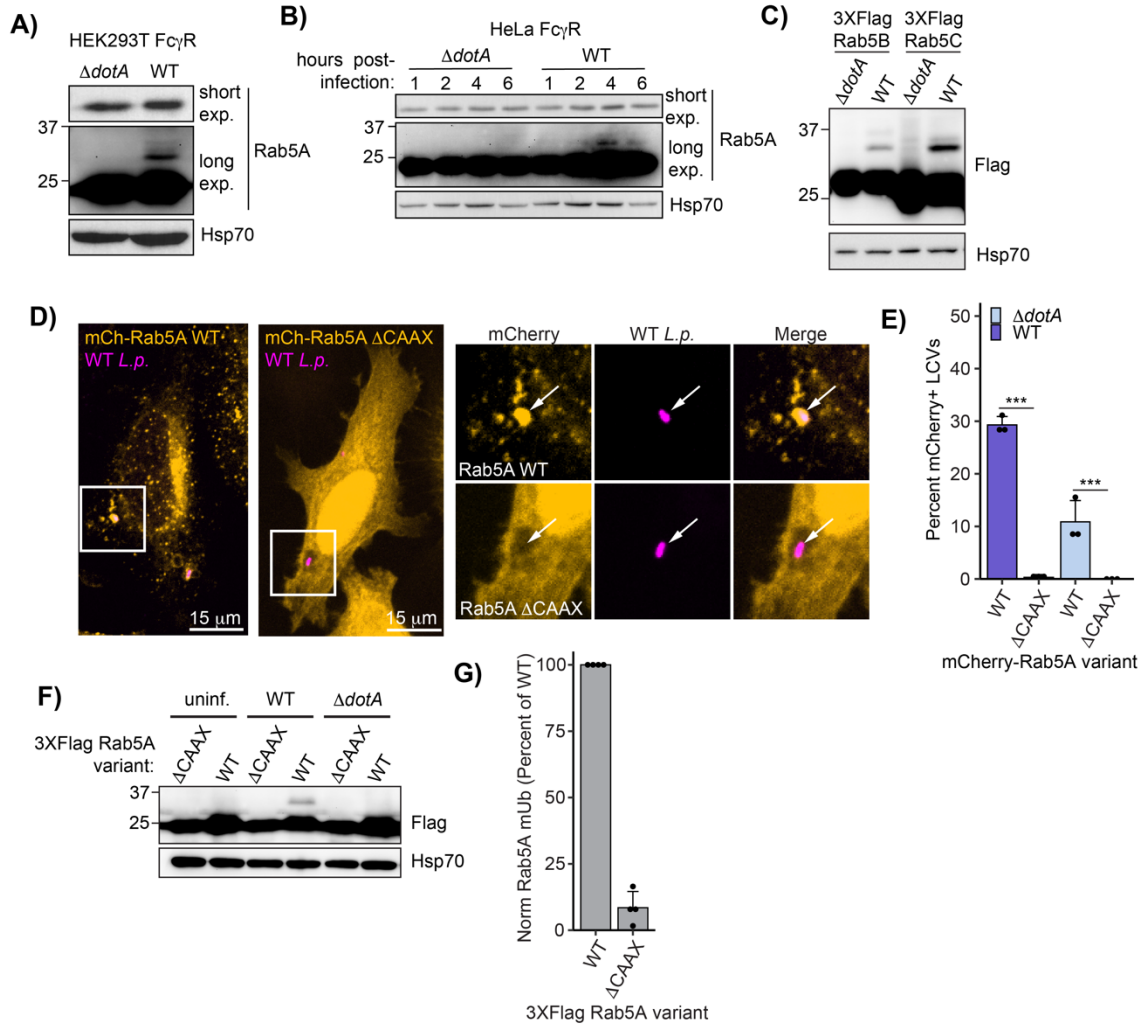

**Figure 5S1: Rab5 ubiquitination reproduces across cell lines and isoforms and is dependent upon membrane localization. Related to Figure 5.**

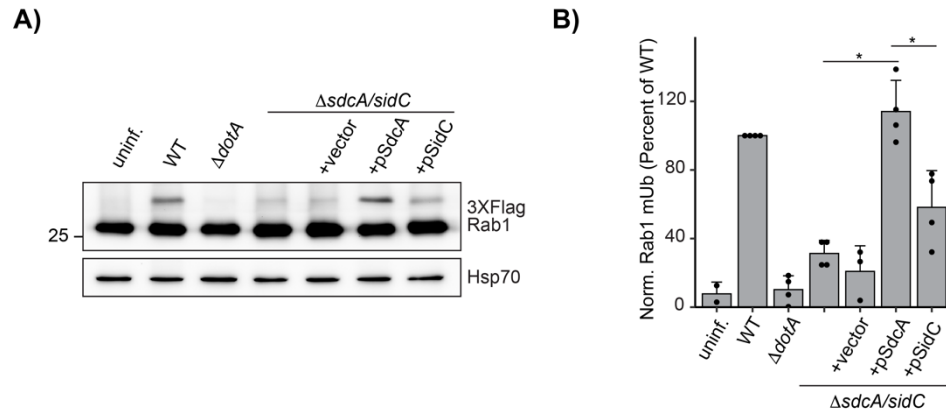

**Figure 7S1: Rab1 ubiquitination is primarily promoted by Sdca. Related to Figure 7.**





## Dictyostellium GTPase LCV recruitment data

| Documented recruitment to WT LCV in <i>Dictyostellium</i> | Closest Human Homologue (Dictybase/BLAST) | Mammalian Homologue Ubiquitinated during WT <i>L.p.</i> infection | LCV Recruitment Source and Data Type |    |    |    |    |    |
|-----------------------------------------------------------|-------------------------------------------|-------------------------------------------------------------------|--------------------------------------|----|----|----|----|----|
|                                                           |                                           |                                                                   | source                               | 1  | 2  | 3  | 4  | 5  |
|                                                           |                                           |                                                                   | data type                            | MS | IF | IF | MS | MS |
| ARFA                                                      | ARF1                                      | x                                                                 | +                                    |    |    | +  |    |    |
| ARL8                                                      | ARL8A, ARL8B                              | x                                                                 |                                      |    |    |    |    | +  |
| SARA                                                      | SAR1A                                     |                                                                   |                                      |    |    | +  |    | +  |
| RAB1A                                                     | RAB1A, RAB1B                              | x                                                                 | +                                    | *  |    | +  |    |    |
| RABG2                                                     | RAB1A                                     | x                                                                 |                                      |    |    |    |    | +  |
| RAB1B                                                     | RAB1B                                     | x                                                                 |                                      |    |    |    |    | +  |
| RABC                                                      | RAB1A, RAB1B                              | x                                                                 | +                                    |    |    |    |    | +  |
| RAB1D                                                     | RAB1A, RAB1B                              | x                                                                 | +                                    |    |    | +  |    | +  |
| RAB2A                                                     | RAB2A                                     | x                                                                 |                                      |    |    | +  | +  | +  |
| RAB2B                                                     | RAB2B                                     | x                                                                 |                                      |    |    | +  | +  | +  |
| RABQ                                                      | RAB2B, RAB2A                              | x                                                                 |                                      |    |    |    |    | +  |
| RAB4                                                      | RAB4A                                     | x                                                                 |                                      |    |    |    |    | +  |
| RAB5A                                                     | RAB5A                                     | x                                                                 |                                      |    |    | +  | *  | +  |
| RAB5B                                                     | RAB5B                                     | x                                                                 |                                      |    |    |    | *  | +  |
| RAB6                                                      | RAB6A                                     | x                                                                 |                                      |    |    | +  |    | +  |
| RAB7A                                                     | RAB7A                                     | x                                                                 | +                                    | *  |    | +  | +  | +  |
| RAB8A                                                     | RAB8A                                     | x                                                                 | +                                    | *  |    | +  | +  | +  |
| RAB11A                                                    | RAB11A                                    | x                                                                 |                                      |    |    | +  | +  | +  |
| RAB11B                                                    | RAB11B                                    | x                                                                 |                                      |    |    |    | *  | +  |
| RAB11C                                                    | RAB11B                                    | x                                                                 |                                      |    |    |    | *  | +  |
| RAB14                                                     | RAB14                                     | x                                                                 | +                                    | *  |    | +  | +  |    |
| RAB18                                                     | RAB18                                     | x                                                                 |                                      |    |    | +  |    | +  |
| RAB32A                                                    | RAB32, RAB38                              | x                                                                 |                                      |    |    | +  | +  | +  |
| RAB32B                                                    | RAB32                                     | x                                                                 |                                      |    |    |    |    | +  |
| RAB32C                                                    | RAB32                                     | x                                                                 |                                      |    |    |    |    | +  |
| RAB32D                                                    | RAB32                                     | x                                                                 |                                      |    |    |    |    | +  |
| RANA                                                      | RAN                                       | x                                                                 | +                                    |    | *  | +  | +  | +  |
| RASB                                                      | KRAS                                      | x                                                                 |                                      |    |    |    |    | +  |
| RASC                                                      | KRAS                                      | x                                                                 |                                      |    |    |    |    | +  |
| RASG                                                      | KRAS                                      | x                                                                 | +                                    |    |    | +  | +  | +  |
| RASS                                                      | KRAS                                      | x                                                                 |                                      |    |    | +  |    | +  |
| RAPA                                                      | RAP1A, RAP1B                              | x                                                                 |                                      |    |    | +  | +  | +  |
| RAC1A                                                     | RAC1                                      | x                                                                 |                                      |    |    |    |    | +  |
| RACB                                                      | RAC1                                      | x                                                                 |                                      |    |    | +  |    | +  |
| RACC                                                      | RAC1                                      | x                                                                 |                                      |    |    |    |    | +  |
| RACE                                                      | RAC1                                      | x                                                                 |                                      |    |    | +  |    | +  |
| GEMA                                                      | RHOT1                                     |                                                                   |                                      |    |    |    | +  | +  |

**Legend**

- + Detected in purified LCV proteomics
- Detected on LCV via immunofluorescence
- ∅ Not detected on LCV via immunofluorescence

**Figure 7S3: Small GTPases with detected ubiquitinations overlap with *Dictyostellium* small GTPases known to be recruited to the LCV. Related to Figure 7.**
